# Supplementary material for: Electronic and structural properties of Y6Pt13X4, site occupancy variants of the Ba6Na16N subnitride (X = Al, Ga)
Source: Royal Society of Chemistry journal article supplement (doi:10.1039/d3dt00292f), 2023-01-01
Supplement: d3dt00292f1.pdf [file d3dt00292f1.pdf]

Supporting Information

**Electronic and structural properties of  $Y_6Pt_{13}X_4$ , the site occupancy variants of the  $Ba_6Na_{16}N$  subnitride ( $X = Al, Ga$ )**

Leonid Salamakha<sup>1,4,#</sup>, Oksana Sologub<sup>1</sup>, Berthold Stöger<sup>2</sup>, Herwig Michor<sup>1</sup>, Ernst Bauer<sup>1</sup>,  
Peter Rogl<sup>3</sup>, Stepan Mudry<sup>4</sup>

<sup>1</sup>Institute of Solid State Physics, TU Wien, A-1040 Vienna, Austria

<sup>2</sup>Institute for Chemical Technologies and Analytics, TU Wien, A-1040 Vienna, Austria

<sup>3</sup>Institute of Materials Chemistry, University of Vienna, A-1090 Vienna, Austria

<sup>4</sup>Department of Physics of Metals, I. Franko L'viv National University, 79005 L'viv, Ukraine

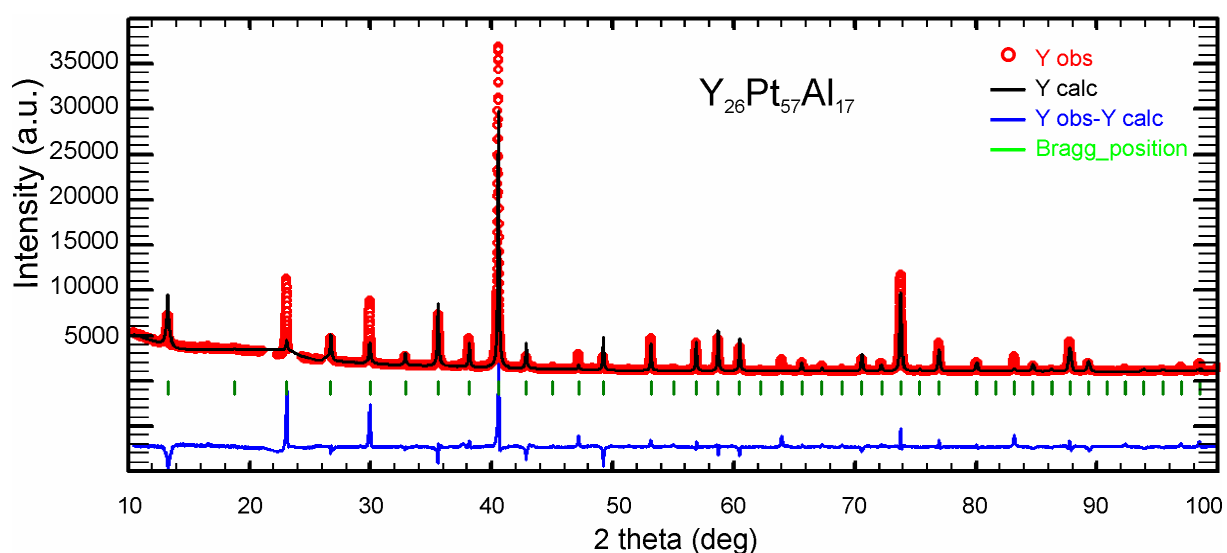

**Figure S1.** Powder X-ray diffraction intensity data of  $Y_{26}Pt_{57}Al_{17}$  alloy refined on the basis of the  $Ce_3Ni_6Si_2$  structure model (space group  $Im-3m$ ,  $a=9.43052$  Å,  $R_F=0.190$ ,  $R_I=0.280$ ).

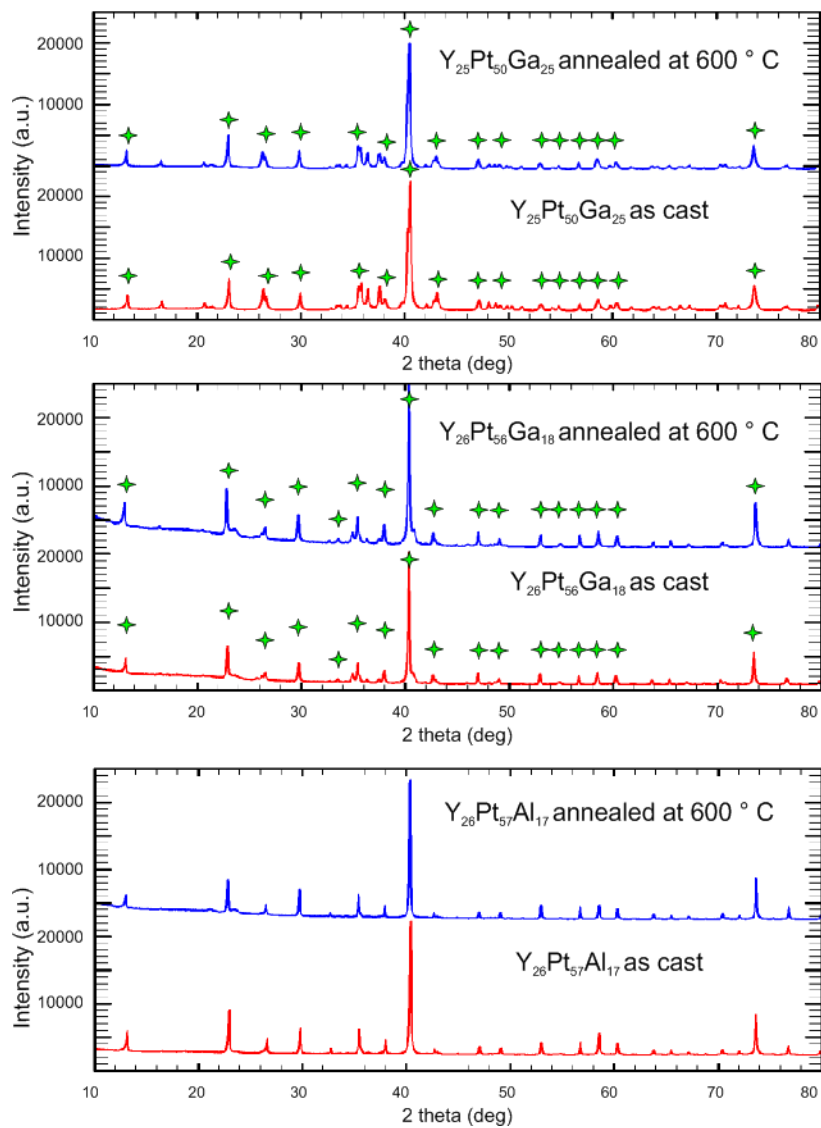

**Figure S2.** Powder X-ray diffraction intensity data of as cast and annealed multiphase Y-Pt-Ga alloys in comparison with single phase Y-Pt-Al alloy ( $Y_6Pt_{13}Al_4$  compound). Reflections marked with green stars correspond to  $Y_6Pt_{13}Ga_4$  phase.

# Y<sub>6</sub>Pt<sub>13</sub>Al<sub>4</sub>: Crystallographic Information File

##CIF\_1.1

# CIF produced by WinGX routine CIF\_UPDATE  
# Created on 2023-01-27 at 15:26:09  
# Using CIFtbx version 2.6.2 16 Jun 1998

# Dictionary name : cif\_core.dic  
# Dictionary vers : 2.2  
# Request file : \wingx\files\archive.dat  
# CIF files read : yptal1\_3

data\_yptal1\_3

\_audit\_creation\_date 2023-01-27T15:26:09-00:00  
\_audit\_creation\_method 'WinGX routine CIF\_UPDATE'  
\_audit\_conform\_dict\_name cif\_core.dic  
\_audit\_conform\_dict\_version 2.2  
\_audit\_conform\_dict\_location ftp://ftp.iucr.org/pub/cif\_core.dic  
\_publ\_requested\_category FI

#-----#  
# CHEMICAL INFORMATION #  
#-----#

\_chemical\_name\_systematic

;

?

;

\_chemical\_formula\_sum 'Al4 Pt13 Y6'  
\_chemical\_formula\_weight 3177.55

#-----#  
# UNIT CELL INFORMATION #  
#-----#

\_symmetry\_cell\_setting cubic  
\_symmetry\_space\_group\_name\_H-M 'I m -3 m'  
\_symmetry\_space\_group\_name\_Hall '-I 4 2 3'  
\_symmetry\_Int\_Tables\_number 229

loop\_

\_symmetry\_equiv\_pos\_as\_xyz

'x, y, z'  
'x, -y, -z'  
'-x, -y, z'  
'-x, y, -z'  
'-y, x, z'  
'y, x, -z'  
'y, -x, z'  
'-y, -x, -z'  
'y, z, x'  
'-y, -z, x'  
'y, -z, -x'  
'-y, z, -x'  
'-z, y, x'  
'-z, -y, -x'  
'z, -y, x'  
'z, y, -x'  
'z, x, y'  
'-z, x, -y'  
'-z, -x, y'  
'z, -x, -y'  
'-x, -z, -y'  
'-x, z, y'  
'x, -z, y'  
'x, z, -y'  
'x+1/2, y+1/2, z+1/2'  
'x+1/2, -y+1/2, -z+1/2'  
'-x+1/2, -y+1/2, z+1/2'  
'-x+1/2, y+1/2, -z+1/2'  
'-y+1/2, x+1/2, z+1/2'  
'y+1/2, x+1/2, -z+1/2'  
'y+1/2, -x+1/2, z+1/2'

'-y+1/2, -x+1/2, -z+1/2'  
'y+1/2, z+1/2, x+1/2'  
'-y+1/2, -z+1/2, x+1/2'  
'y+1/2, -z+1/2, -x+1/2'  
'-y+1/2, z+1/2, -x+1/2'  
'-z+1/2, y+1/2, x+1/2'  
'-z+1/2, -y+1/2, -x+1/2'  
'z+1/2, -y+1/2, x+1/2'  
'z+1/2, y+1/2, -x+1/2'  
'z+1/2, x+1/2, y+1/2'  
'-z+1/2, x+1/2, -y+1/2'  
'-z+1/2, -x+1/2, y+1/2'  
'z+1/2, -x+1/2, -y+1/2'  
'-x+1/2, -z+1/2, -y+1/2'  
'-x+1/2, z+1/2, y+1/2'  
'x+1/2, -z+1/2, y+1/2'  
'x+1/2, z+1/2, -y+1/2'  
'-x, -y, -z'  
'-x, y, z'  
'x, y, -z'  
'x, -y, z'  
'y, -x, -z'  
'-y, -x, z'  
'-y, x, -z'  
'y, x, z'  
'-y, -z, -x'  
'y, z, -x'  
'-y, z, x'  
'y, -z, x'  
'z, -y, -x'  
'z, y, x'  
'-z, y, -x'  
'-z, -y, x'  
'-z, -x, -y'  
'z, -x, y'  
'z, x, -y'  
'-z, x, y'  
'x, z, y'  
'x, -z, -y'  
'-x, z, -y'  
'-x, -z, y'  
'-x+1/2, -y+1/2, -z+1/2'  
'-x+1/2, y+1/2, z+1/2'  
'x+1/2, y+1/2, -z+1/2'  
'x+1/2, -y+1/2, z+1/2'  
'y+1/2, -x+1/2, -z+1/2'  
'-y+1/2, -x+1/2, z+1/2'  
'-y+1/2, x+1/2, -z+1/2'  
'y+1/2, x+1/2, z+1/2'  
'-y+1/2, -z+1/2, -x+1/2'  
'y+1/2, z+1/2, -x+1/2'  
'-y+1/2, z+1/2, x+1/2'  
'y+1/2, -z+1/2, x+1/2'  
'z+1/2, -y+1/2, -x+1/2'  
'z+1/2, y+1/2, x+1/2'  
'-z+1/2, y+1/2, -x+1/2'  
'-z+1/2, -y+1/2, x+1/2'  
'-z+1/2, -x+1/2, -y+1/2'  
'z+1/2, -x+1/2, y+1/2'  
'z+1/2, x+1/2, -y+1/2'  
'-z+1/2, x+1/2, y+1/2'  
'x+1/2, z+1/2, y+1/2'  
'x+1/2, -z+1/2, -y+1/2'  
'-x+1/2, z+1/2, -y+1/2'  
'-x+1/2, -z+1/2, y+1/2'

|                               |           |
|-------------------------------|-----------|
| _cell_length_a                | 9.4422(2) |
| _cell_length_b                | 9.4422(2) |
| _cell_length_c                | 9.4422(2) |
| _cell_angle_alpha             | 90        |
| _cell_angle_beta              | 90        |
| _cell_angle_gamma             | 90        |
| _cell_volume                  | 841.82(3) |
| _cell_formula_units_Z         | 2         |
| _cell_measurement_temperature | 293(2)    |
| _cell_measurement_wavelength  | 0.71073   |
| _cell_measurement_reflns_used | 9166      |

```

_cell_measurement_theta_min    3.05
_cell_measurement_theta_max    35.15

#-----#
#          CRYSTAL INFORMATION          #
#-----#

_exptl_crystal_description     cube
_exptl_crystal_colour          silver
_exptl_crystal_size_max       0.05
_exptl_crystal_size_mid       0.05
_exptl_crystal_size_min       0.05
_exptl_crystal_density_meas    ?
_exptl_crystal_density_diffn   12.536
_exptl_crystal_density_method  'not measured'
_exptl_crystal_F_000          2600
_exptl_special_details
;
?
;

#-----#
#          ABSORPTION CORRECTION        #
#-----#

_exptl_absorpt_coefficient_mu   128.083
_exptl_absorpt_correction_type  none

#-----#
#          DATA COLLECTION              #
#-----#

_diffrn_ambient_temperature     293(2)
_diffrn_radiation_wavelength    0.71073
_diffrn_radiation_type          MoK $\alpha$ 
_diffrn_radiation_monochromator  graphite
_diffrn_measurement_device_type  'Bruker APEX II CCD area-detector'
_diffrn_reflns_av_R_equivalents 0.0599
_diffrn_reflns_av_unetl/netl    0.0141
_diffrn_reflns_number           9166
_diffrn_reflns_limit_h_min      -15
_diffrn_reflns_limit_h_max      15
_diffrn_reflns_limit_k_min      -14
_diffrn_reflns_limit_k_max      15
_diffrn_reflns_limit_l_min      -14
_diffrn_reflns_limit_l_max      15
_diffrn_reflns_theta_min        3.05
_diffrn_reflns_theta_max        35.15
_diffrn_reflns_theta_full       35.15
_diffrn_measured_fraction_theta_full
                                0.995
_diffrn_measured_fraction_theta_max
                                0.995
_reflns_number_total            220
_reflns_number_gt               211
_reflns_threshold_expression     >2sigma(I)

#-----#
#          COMPUTER PROGRAMS USED        #
#-----#

_computing_structure_refinement  'SHELXL-97 (Sheldrick, 1997)'

#-----#
#          REFINEMENT INFORMATION        #
#-----#

_refine_special_details
;
Refinement of F2 against ALL reflections. The weighted R-factor wR and
goodness of fit S are based on F2, conventional R-factors R are based
on F, with F set to zero for negative F2. The threshold expression of
F2 > 2sigma(F2) is used only for calculating R-factors(gt) etc. and is
not relevant to the choice of reflections for refinement. R-factors based
on F2 are statistically about twice as large as those based on F, and R-
factors based on ALL data will be even larger.
;

```

```

_refine_ls_structure_factor_coef Fsqd
_refine_ls_matrix_type full
_refine_ls_weighting_scheme calc
_refine_ls_weighting_details
'calc w=1/(ls^2*(Fo^2)+(0.0055P)^2+5.1668P] where P=(Fo^2+2Fc^2)/3'
_atom_sites_solution_primary direct
_atom_sites_solution_secondary difmap
_atom_sites_solution_hydrogens 'none'
_refine_ls_hydrogen_treatment 'none'
_refine_ls_extinction_method SHELXL
_refine_ls_extinction_expression
Fc^k=kFc[1+0.001xFc^2/l^3/sin(2\q)]^-1/4^
_refine_ls_extinction_coef 0.000110(10)
_refine_ls_number_reflns 220
_refine_ls_number_parameters 12
_refine_ls_number_restraints 0
_refine_ls_R_factor_all 0.0115
_refine_ls_R_factor_gt 0.0107
_refine_ls_wR_factor_ref 0.0228
_refine_ls_wR_factor_gt 0.0227
_refine_ls_goodness_of_fit_ref 1.162
_refine_ls_restrained_S_all 1.162
_refine_ls_shift/su_max 0.001
_refine_ls_shift/su_mean 0
_refine_diff_density_max 1.449
_refine_diff_density_min -1.948
_refine_diff_density_rms 0.249

#-----#
#          ATOMIC TYPES, COORDINATES AND THERMAL PARAMETERS          #
#-----#

loop_
  _atom_type_symbol
  _atom_type_description
  _atom_type_scatter_dispersion_real
  _atom_type_scatter_dispersion_imag
  _atom_type_scatter_source
Al Al 0.0645 0.0514 'International Tables Vol C Tables 4.2.6.8 and 6.1.1.4'
Pt Pt -1.7033 8.3905 'International Tables Vol C Tables 4.2.6.8 and 6.1.1.4'
Y Y -2.7962 3.5667 'International Tables Vol C Tables 4.2.6.8 and 6.1.1.4'

loop_
  _atom_site_label
  _atom_site_type_symbol
  _atom_site_fract_x
  _atom_site_fract_y
  _atom_site_fract_z
  _atom_site_U_iso_or_equiv
  _atom_site_adp_type
  _atom_site_occupancy
  _atom_site_symmetry_multiplicity
  _atom_site_calc_flag
  _atom_site_refinement_flags
  _atom_site_disorder_assembly
  _atom_site_disorder_group
Y1 Y 0.30037(8) 0 0 0.00521(12) Uani 1 8 d S . .
Pt1 Pt 0 0.322648(16) 0.322648(16) 0.00431(6) Uani 1 4 d S . .
Pt2 Pt 0 0 0 0.00715(13) Uani 1 48 d S . .
Al1 Al 0.25 0.25 0.25 0.0058(5) Uani 1 12 d S . .

loop_
  _atom_site_aniso_label
  _atom_site_aniso_U_11
  _atom_site_aniso_U_22
  _atom_site_aniso_U_33
  _atom_site_aniso_U_23
  _atom_site_aniso_U_13
  _atom_site_aniso_U_12
Y1 0.0058(3) 0.00493(18) 0.00493(18) 0 0 0
Pt1 0.00306(9) 0.00493(7) 0.00493(7) 0.00136(6) 0 0
Pt2 0.00715(13) 0.00715(13) 0.00715(13) 0 0 0
Al1 0.0058(5) 0.0058(5) 0.0058(5) 0.0017(6) 0.0017(6) 0.0017(6)

#-----#
#          MOLECULAR GEOMETRY          #
#-----#

```

#-----#

\_geom\_special\_details

;  
All esds (except the esd in the dihedral angle between two l.s. planes)  
are estimated using the full covariance matrix. The cell esds are taken  
into account individually in the estimation of esds in distances, angles  
and torsion angles; correlations between esds in cell parameters are only  
used when they are defined by crystal symmetry. An approximate (isotropic)  
treatment of cell esds is used for estimating esds involving l.s. planes.

;

loop\_

\_geom\_bond\_atom\_site\_label\_1  
\_geom\_bond\_atom\_site\_label\_2  
\_geom\_bond\_distance  
\_geom\_bond\_site\_symmetry\_2  
\_geom\_bond\_publ\_flag

Y1 Pt2 2.8362(8) . ?  
Y1 Pt1 3.0268(5) 73 ?  
Y1 Pt1 3.0268(5) 75\_545 ?  
Y1 Pt1 3.0268(5) 27\_554 ?  
Y1 Pt1 3.0268(5) 25\_544 ?  
Y1 Pt1 3.05376(17) 11 ?  
Y1 Pt1 3.05376(17) 53 ?  
Y1 Pt1 3.05376(17) 7 ?  
Y1 Pt1 3.05376(18) 9 ?  
Y1 Al1 3.37203(13) 2 ?  
Y1 Al1 3.37203(13) . ?  
Y1 Al1 3.37203(13) 28\_545 ?  
Pt1 Al1 2.55210(10) 26\_455 ?  
Pt1 Al1 2.55210(10) . ?  
Pt1 Pt1 2.7369(2) 81 ?  
Pt1 Pt1 2.7369(2) 79 ?  
Pt1 Pt1 2.7369(2) 35\_455 ?  
Pt1 Pt1 2.7369(2) 77\_455 ?  
Pt1 Y1 3.0268(5) 73 ?  
Pt1 Y1 3.0268(5) 25\_455 ?  
Pt1 Y1 3.05376(17) 5 ?  
Pt1 Y1 3.05376(17) 9 ?  
Pt2 Y1 2.8362(8) 57 ?  
Pt2 Y1 2.8362(8) 53 ?  
Pt2 Y1 2.8362(8) 49 ?  
Pt2 Y1 2.8362(8) 5 ?  
Pt2 Y1 2.8362(8) 9 ?  
Al1 Pt1 2.55210(10) 81 ?  
Al1 Pt1 2.55210(10) 9 ?  
Al1 Pt1 2.55210(10) 79 ?  
Al1 Pt1 2.55210(10) 7 ?  
Al1 Pt1 2.55210(10) 73 ?  
Al1 Y1 3.37203(13) 81 ?  
Al1 Y1 3.37203(13) 9 ?  
Al1 Y1 3.37203(13) 77 ?  
Al1 Y1 3.37203(13) 5 ?  
Al1 Y1 3.37203(13) 73 ?

loop\_

\_geom\_angle\_atom\_site\_label\_1  
\_geom\_angle\_atom\_site\_label\_2  
\_geom\_angle\_atom\_site\_label\_3  
\_geom\_angle  
\_geom\_angle\_site\_symmetry\_1  
\_geom\_angle\_site\_symmetry\_3  
\_geom\_angle\_publ\_flag

Pt2 Y1 Pt1 128.517(11) . 73 ?  
Pt2 Y1 Pt1 128.517(11) . 75\_545 ?  
Pt1 Y1 Pt1 67.181(12) 73 75\_545 ?  
Pt2 Y1 Pt1 128.517(11) . 27\_554 ?  
Pt1 Y1 Pt1 67.181(12) 73 27\_554 ?  
Pt1 Y1 Pt1 102.97(2) 75\_545 27\_554 ?  
Pt2 Y1 Pt1 128.517(11) . 25\_544 ?  
Pt1 Y1 Pt1 102.97(2) 73 25\_544 ?  
Pt1 Y1 Pt1 67.181(12) 75\_545 25\_544 ?  
Pt1 Y1 Pt1 67.181(12) 27\_554 25\_544 ?  
Pt2 Y1 Pt1 93.949(14) . 11 ?  
Pt1 Y1 Pt1 120.601(17) 73 11 ?  
Pt1 Y1 Pt1 53.499(5) 75\_545 11 ?  
Pt1 Y1 Pt1 120.601(17) 27\_554 11 ?

Pt1 Y1 Pt1 53.499(5) 25\_544 11 ?  
Pt2 Y1 Pt1 93.949(14) . 53 ?  
Pt1 Y1 Pt1 120.601(17) 73 53 ?  
Pt1 Y1 Pt1 120.601(17) 75\_545 53 ?  
Pt1 Y1 Pt1 53.499(5) 27\_554 53 ?  
Pt1 Y1 Pt1 53.499(5) 25\_544 53 ?  
Pt1 Y1 Pt1 89.728(2) 11 53 ?  
Pt2 Y1 Pt1 93.949(14) . 7 ?  
Pt1 Y1 Pt1 53.499(5) 73 7 ?  
Pt1 Y1 Pt1 53.499(5) 75\_545 7 ?  
Pt1 Y1 Pt1 120.601(17) 27\_554 7 ?  
Pt1 Y1 Pt1 120.601(17) 25\_544 7 ?  
Pt1 Y1 Pt1 89.728(2) 11 7 ?  
Pt1 Y1 Pt1 172.10(3) 53 7 ?  
Pt2 Y1 Pt1 93.949(14) . 9 ?  
Pt1 Y1 Pt1 53.499(5) 73 9 ?  
Pt1 Y1 Pt1 120.601(17) 75\_545 9 ?  
Pt1 Y1 Pt1 53.499(5) 27\_554 9 ?  
Pt1 Y1 Pt1 120.601(17) 25\_544 9 ?  
Pt1 Y1 Pt1 172.10(3) 11 9 ?  
Pt1 Y1 Pt1 89.728(2) 53 9 ?  
Pt1 Y1 Pt1 89.728(2) 7 9 ?  
Pt2 Y1 Al1 81.891(13) . 2 ?  
Pt1 Y1 Al1 149.59(2) 73 2 ?  
Pt1 Y1 Al1 95.039(7) 75\_545 2 ?  
Pt1 Y1 Al1 95.039(7) 27\_554 2 ?  
Pt1 Y1 Al1 46.626(3) 25\_544 2 ?  
Pt1 Y1 Al1 46.4760(10) 11 2 ?  
Pt1 Y1 Al1 46.4760(10) 53 2 ?  
Pt1 Y1 Al1 135.080(2) 7 2 ?  
Pt1 Y1 Al1 135.080(2) 9 2 ?  
Pt2 Y1 Al1 81.891(13) . . ?  
Pt1 Y1 Al1 46.626(3) 73 . ?  
Pt1 Y1 Al1 95.039(7) 75\_545 . ?  
Pt1 Y1 Al1 95.039(7) 27\_554 . ?  
Pt1 Y1 Al1 149.59(2) 25\_544 . ?  
Pt1 Y1 Al1 135.080(2) 11 . ?  
Pt1 Y1 Al1 135.080(2) 53 . ?  
Pt1 Y1 Al1 46.4760(10) 7 . ?  
Pt1 Y1 Al1 46.4760(10) 9 . ?  
Al1 Y1 Al1 163.78(3) 2 . ?  
Pt2 Y1 Al1 81.891(13) . 28\_545 ?  
Pt1 Y1 Al1 95.039(7) 73 28\_545 ?  
Pt1 Y1 Al1 46.626(3) 75\_545 28\_545 ?  
Pt1 Y1 Al1 149.59(2) 27\_554 28\_545 ?  
Pt1 Y1 Al1 95.039(7) 25\_544 28\_545 ?  
Pt1 Y1 Al1 46.4760(10) 11 28\_545 ?  
Pt1 Y1 Al1 135.080(2) 53 28\_545 ?  
Pt1 Y1 Al1 46.4760(10) 7 28\_545 ?  
Pt1 Y1 Al1 135.080(2) 9 28\_545 ?  
Al1 Y1 Al1 88.860(4) 2 28\_545 ?  
Al1 Y1 Al1 88.860(4) . 28\_545 ?  
Al1 Pt1 Al1 135.319(9) 26\_455 . ?  
Al1 Pt1 Pt1 126.559(7) 26\_455 81 ?  
Al1 Pt1 Pt1 57.574(2) . 81 ?  
Al1 Pt1 Pt1 126.559(7) 26\_455 79 ?  
Al1 Pt1 Pt1 57.574(2) . 79 ?  
Pt1 Pt1 Pt1 103.830(9) 81 79 ?  
Al1 Pt1 Pt1 57.574(2) 26\_455 35\_455 ?  
Al1 Pt1 Pt1 126.559(7) . 35\_455 ?  
Pt1 Pt1 Pt1 75.448(7) 81 35\_455 ?  
Pt1 Pt1 Pt1 171.030(13) 79 35\_455 ?  
Al1 Pt1 Pt1 57.574(2) 26\_455 77\_455 ?  
Al1 Pt1 Pt1 126.559(7) . 77\_455 ?  
Pt1 Pt1 Pt1 171.030(13) 81 77\_455 ?  
Pt1 Pt1 Pt1 75.448(7) 79 77\_455 ?  
Pt1 Pt1 Pt1 103.830(9) 35\_455 77\_455 ?  
Al1 Pt1 Y1 150.858(12) 26\_455 73 ?  
Al1 Pt1 Y1 73.824(12) . 73 ?  
Pt1 Pt1 Y1 63.755(9) 81 73 ?  
Pt1 Pt1 Y1 63.755(9) 79 73 ?  
Pt1 Pt1 Y1 108.654(8) 35\_455 73 ?  
Pt1 Pt1 Y1 108.654(8) 77\_455 73 ?  
Al1 Pt1 Y1 73.824(12) 26\_455 25\_455 ?  
Al1 Pt1 Y1 150.858(13) . 25\_455 ?  
Pt1 Pt1 Y1 108.654(8) 81 25\_455 ?  
Pt1 Pt1 Y1 108.654(8) 79 25\_455 ?



Pt1 Pt1 Y1 63.755(9) 35\_455 25\_455 ?  
Pt1 Pt1 Y1 63.755(9) 77\_455 25\_455 ?  
Y1 Pt1 Y1 77.03(2) 73 25\_455 ?  
Al1 Pt1 Y1 73.342(5) 26\_455 5 ?  
Al1 Pt1 Y1 73.342(5) . 5 ?  
Pt1 Pt1 Y1 125.161(10) 81 5 ?  
Pt1 Pt1 Y1 62.746(12) 79 5 ?  
Pt1 Pt1 Y1 125.161(10) 35\_455 5 ?  
Pt1 Pt1 Y1 62.746(12) 77\_455 5 ?  
Y1 Pt1 Y1 126.161(2) 73 5 ?  
Y1 Pt1 Y1 126.160(2) 25\_455 5 ?  
Al1 Pt1 Y1 73.342(5) 26\_455 9 ?  
Al1 Pt1 Y1 73.342(5) . 9 ?  
Pt1 Pt1 Y1 62.746(12) 81 9 ?  
Pt1 Pt1 Y1 125.161(10) 79 9 ?  
Pt1 Pt1 Y1 62.746(12) 35\_455 9 ?  
Pt1 Pt1 Y1 125.161(10) 77\_455 9 ?  
Y1 Pt1 Y1 126.161(3) 73 9 ?  
Y1 Pt1 Y1 126.160(2) 25\_455 9 ?  
Y1 Pt1 Y1 82.10(3) 5 9 ?  
Y1 Pt2 Y1 90 57 53 ?  
Y1 Pt2 Y1 90 57 49 ?  
Y1 Pt2 Y1 90 53 49 ?  
Y1 Pt2 Y1 90 57 . ?  
Y1 Pt2 Y1 90 53 . ?  
Y1 Pt2 Y1 180 49 . ?  
Y1 Pt2 Y1 90 57 5 ?  
Y1 Pt2 Y1 180 53 5 ?  
Y1 Pt2 Y1 90 49 5 ?  
Y1 Pt2 Y1 90 . 5 ?  
Y1 Pt2 Y1 180 57 9 ?  
Y1 Pt2 Y1 90 53 9 ?  
Y1 Pt2 Y1 90 49 9 ?  
Y1 Pt2 Y1 90 . 9 ?  
Y1 Pt2 Y1 90 5 9 ?  
Pt1 Al1 Pt1 64.851(3) . 81 ?  
Pt1 Al1 Pt1 115.149(3) . 9 ?  
Pt1 Al1 Pt1 180 81 9 ?  
Pt1 Al1 Pt1 64.851(3) . 79 ?  
Pt1 Al1 Pt1 115.149(3) 81 79 ?  
Pt1 Al1 Pt1 64.851(3) 9 79 ?  
Pt1 Al1 Pt1 115.149(3) . 7 ?  
Pt1 Al1 Pt1 64.851(3) 81 7 ?  
Pt1 Al1 Pt1 115.149(3) 9 7 ?  
Pt1 Al1 Pt1 180 79 7 ?  
Pt1 Al1 Pt1 180 . 73 ?  
Pt1 Al1 Pt1 115.149(3) 81 73 ?  
Pt1 Al1 Pt1 64.851(3) 9 73 ?  
Pt1 Al1 Pt1 115.149(3) 79 73 ?  
Pt1 Al1 Pt1 64.851(3) 7 73 ?  
Pt1 Al1 Y1 120.449(14) . . ?  
Pt1 Al1 Y1 119.818(4) 81 . ?  
Pt1 Al1 Y1 60.182(4) 9 . ?  
Pt1 Al1 Y1 119.818(4) 79 . ?  
Pt1 Al1 Y1 60.182(4) 7 . ?  
Pt1 Al1 Y1 59.551(14) 73 . ?  
Pt1 Al1 Y1 119.818(4) . 81 ?  
Pt1 Al1 Y1 120.449(14) 81 81 ?  
Pt1 Al1 Y1 59.551(14) 9 81 ?  
Pt1 Al1 Y1 60.182(4) 79 81 ?  
Pt1 Al1 Y1 119.818(4) 7 81 ?  
Pt1 Al1 Y1 60.182(4) 73 81 ?  
Y1 Al1 Y1 107.01(2) . 81 ?  
Pt1 Al1 Y1 60.182(4) . 9 ?  
Pt1 Al1 Y1 59.551(14) 81 9 ?  
Pt1 Al1 Y1 120.449(14) 9 9 ?  
Pt1 Al1 Y1 119.818(4) 79 9 ?  
Pt1 Al1 Y1 60.182(4) 7 9 ?  
Pt1 Al1 Y1 119.818(4) 73 9 ?  
Y1 Al1 Y1 72.99(2) . 9 ?  
Y1 Al1 Y1 180 81 9 ?  
Pt1 Al1 Y1 119.818(4) . 77 ?  
Pt1 Al1 Y1 60.182(4) 81 77 ?  
Pt1 Al1 Y1 119.818(4) 9 77 ?  
Pt1 Al1 Y1 120.449(14) 79 77 ?  
Pt1 Al1 Y1 59.551(14) 7 77 ?  
Pt1 Al1 Y1 60.182(4) 73 77 ?

Y1 AI1 Y1 107.01(2) . 77 ?  
Y1 AI1 Y1 72.99(2) 81 77 ?  
Y1 AI1 Y1 107.01(2) 9 77 ?  
Pt1 AI1 Y1 60.182(4) . 5 ?  
Pt1 AI1 Y1 119.818(4) 81 5 ?  
Pt1 AI1 Y1 60.182(4) 9 5 ?  
Pt1 AI1 Y1 59.551(14) 79 5 ?  
Pt1 AI1 Y1 120.449(14) 7 5 ?  
Pt1 AI1 Y1 119.818(4) 73 5 ?  
Y1 AI1 Y1 72.99(2) . 5 ?  
Y1 AI1 Y1 107.01(2) 81 5 ?  
Y1 AI1 Y1 72.99(2) 9 5 ?  
Y1 AI1 Y1 180 77 5 ?  
Pt1 AI1 Y1 59.551(14) . 73 ?  
Pt1 AI1 Y1 60.182(4) 81 73 ?  
Pt1 AI1 Y1 119.818(4) 9 73 ?  
Pt1 AI1 Y1 60.182(4) 79 73 ?  
Pt1 AI1 Y1 119.818(4) 7 73 ?  
Pt1 AI1 Y1 120.449(14) 73 73 ?  
Y1 AI1 Y1 180.00(3) . 73 ?  
Y1 AI1 Y1 72.99(2) 81 73 ?  
Y1 AI1 Y1 107.01(2) 9 73 ?  
Y1 AI1 Y1 72.99(2) 77 73 ?  
Y1 AI1 Y1 107.01(2) 5 73 ?

---

# Y<sub>6</sub>Pt<sub>13</sub>Ga<sub>4</sub>: Crystallographic Information File

##CIF\_1.1

# CIF produced by WinGX routine CIF\_UPDATE  
# Created on 2023-01-28 at 14:56:34  
# Using CIFtbx version 2.6.2 16 Jun 1998

# Dictionary name : cif\_core.dic  
# Dictionary vers : 2.2  
# Request file : \wingx\files\archive.dat  
# CIF files read : yptga1\_5

data\_yptga1\_5

\_audit\_creation\_date 2023-01-28T14:56:34-00:00  
\_audit\_creation\_method 'WinGX routine CIF\_UPDATE'  
\_audit\_conform\_dict\_name cif\_core.dic  
\_audit\_conform\_dict\_version 2.2  
\_audit\_conform\_dict\_location ftp://ftp.iucr.org/pub/cif\_core.dic  
\_publ\_requested\_category FI

#-----#  
# CHEMICAL INFORMATION #  
#-----#

\_chemical\_name\_systematic

;  
?  
;

\_chemical\_formula\_sum 'Ga4 Pt13 Y6'  
\_chemical\_formula\_weight 3348.51

#-----#  
# UNIT CELL INFORMATION #  
#-----#

\_symmetry\_cell\_setting cubic  
\_symmetry\_space\_group\_name\_H-M 'I m -3 m'  
\_symmetry\_space\_group\_name\_Hall '-I 4 2 3'  
\_symmetry\_Int\_Tables\_number 229

loop\_

\_symmetry\_equiv\_pos\_as\_xyz

'x, y, z'  
'x, -y, -z'  
'-x, -y, z'  
'-x, y, -z'  
'-y, x, z'  
'y, x, -z'  
'y, -x, z'  
'-y, -x, -z'  
'y, z, x'  
'-y, -z, x'  
'y, -z, -x'  
'-y, z, -x'  
'-z, y, x'  
'-z, -y, -x'  
'z, -y, x'  
'z, y, -x'  
'z, x, y'  
'-z, x, -y'  
'-z, -x, y'  
'z, -x, -y'  
'-x, -z, -y'  
'-x, z, y'  
'x, -z, y'  
'x, z, -y'  
'x+1/2, y+1/2, z+1/2'  
'x+1/2, -y+1/2, -z+1/2'  
'-x+1/2, -y+1/2, z+1/2'  
'-x+1/2, y+1/2, -z+1/2'  
'-y+1/2, x+1/2, z+1/2'  
'y+1/2, x+1/2, -z+1/2'  
'y+1/2, -x+1/2, z+1/2'

'-y+1/2, -x+1/2, -z+1/2'  
'y+1/2, z+1/2, x+1/2'  
'-y+1/2, -z+1/2, x+1/2'  
'y+1/2, -z+1/2, -x+1/2'  
'-y+1/2, z+1/2, -x+1/2'  
'-z+1/2, y+1/2, x+1/2'  
'-z+1/2, -y+1/2, -x+1/2'  
'z+1/2, -y+1/2, x+1/2'  
'z+1/2, y+1/2, -x+1/2'  
'z+1/2, x+1/2, y+1/2'  
'-z+1/2, x+1/2, -y+1/2'  
'-z+1/2, -x+1/2, y+1/2'  
'z+1/2, -x+1/2, -y+1/2'  
'-x+1/2, -z+1/2, -y+1/2'  
'-x+1/2, z+1/2, y+1/2'  
'x+1/2, -z+1/2, y+1/2'  
'x+1/2, z+1/2, -y+1/2'  
'-x, -y, -z'  
'-x, y, z'  
'x, y, -z'  
'x, -y, z'  
'y, -x, -z'  
'-y, -x, z'  
'-y, x, -z'  
'y, x, z'  
'-y, -z, -x'  
'y, z, -x'  
'-y, z, x'  
'y, -z, x'  
'z, -y, -x'  
'z, y, x'  
'-z, y, -x'  
'-z, -y, x'  
'-z, -x, -y'  
'z, -x, y'  
'z, x, -y'  
'-z, x, y'  
'x, z, y'  
'x, -z, -y'  
'-x, z, -y'  
'-x, -z, y'  
'-x+1/2, -y+1/2, -z+1/2'  
'-x+1/2, y+1/2, z+1/2'  
'x+1/2, y+1/2, -z+1/2'  
'x+1/2, -y+1/2, z+1/2'  
'y+1/2, -x+1/2, -z+1/2'  
'-y+1/2, -x+1/2, z+1/2'  
'-y+1/2, x+1/2, -z+1/2'  
'y+1/2, x+1/2, z+1/2'  
'-y+1/2, -z+1/2, -x+1/2'  
'y+1/2, z+1/2, -x+1/2'  
'-y+1/2, z+1/2, x+1/2'  
'y+1/2, -z+1/2, x+1/2'  
'z+1/2, -y+1/2, -x+1/2'  
'z+1/2, y+1/2, x+1/2'  
'-z+1/2, y+1/2, -x+1/2'  
'-z+1/2, -y+1/2, x+1/2'  
'-z+1/2, -x+1/2, -y+1/2'  
'z+1/2, -x+1/2, y+1/2'  
'z+1/2, x+1/2, -y+1/2'  
'-z+1/2, x+1/2, y+1/2'  
'x+1/2, z+1/2, y+1/2'  
'x+1/2, -z+1/2, -y+1/2'  
'-x+1/2, z+1/2, -y+1/2'  
'-x+1/2, -z+1/2, y+1/2'

|                               |            |
|-------------------------------|------------|
| _cell_length_a                | 9.4465(10) |
| _cell_length_b                | 9.4465(10) |
| _cell_length_c                | 9.4465(10) |
| _cell_angle_alpha             | 90         |
| _cell_angle_beta              | 90         |
| _cell_angle_gamma             | 90         |
| _cell_volume                  | 843.0(2)   |
| _cell_formula_units_Z         | 2          |
| _cell_measurement_temperature | 293(2)     |
| _cell_measurement_wavelength  | 0.71073    |
| _cell_measurement_reflns_used | 6167       |

```

_cell_measurement_theta_min    3.05
_cell_measurement_theta_max    35.13

#-----#
#          CRYSTAL INFORMATION          #
#-----#

_exptl_crystal_description     cube
_exptl_crystal_colour          silver
_exptl_crystal_size_max        0.05
_exptl_crystal_size_mid        0.05
_exptl_crystal_size_min        0.05
_exptl_crystal_density_diffn   13.192
_exptl_crystal_density_method  'not measured'
_exptl_crystal_F_000           2744
_exptl_special_details
;
?
;

#-----#
#          ABSORPTION CORRECTION        #
#-----#

_exptl_absorpt_coefficient_mu  133.955
_exptl_absorpt_correction_type  none

#-----#
#          DATA COLLECTION              #
#-----#

_diffn_ambient_temperature     293(2)
_diffn_radiation_wavelength     0.71073
_diffn_radiation_type           MoK $\alpha$ 
_diffn_radiation_monochromator  graphite
_diffn_measurement_device_type  'Bruker APEX II CCD area-detector'
_diffn_reflns_av_R_equivalents  0.099
_diffn_reflns_av_unetl/netl     0.0272
_diffn_reflns_number            6167
_diffn_reflns_limit_h_min       -15
_diffn_reflns_limit_h_max       14
_diffn_reflns_limit_k_min       -15
_diffn_reflns_limit_k_max       15
_diffn_reflns_limit_l_min       -15
_diffn_reflns_limit_l_max       14
_diffn_reflns_theta_min         3.05
_diffn_reflns_theta_max         35.13
_diffn_reflns_theta_full        35.13
_diffn_measured_fraction_theta_full
                                0.995
_diffn_measured_fraction_theta_max
                                0.995

_reflns_number_total            220
_reflns_number_gt                192
_reflns_threshold_expression     >2sigma(I)

#-----#
#          COMPUTER PROGRAMS USED        #
#-----#

_computing_structure_refinement  'SHELXL-97 (Sheldrick, 1997)'

#-----#
#          REFINEMENT INFORMATION        #
#-----#

_refine_special_details
;
Refinement of F2 against ALL reflections. The weighted R-factor wR and
goodness of fit S are based on F2, conventional R-factors R are based
on F, with F set to zero for negative F2. The threshold expression of
F2 > 2sigma(F2) is used only for calculating R-factors(gt) etc. and is
not relevant to the choice of reflections for refinement. R-factors based
on F2 are statistically about twice as large as those based on F, and R-
factors based on ALL data will be even larger.
;
_refine_ls_structure_factor_coef  Fsqd

```

```

_refine_ls_matrix_type          full
_refine_ls_weighting_scheme     calc
_refine_ls_weighting_details
'calc w=1/[\s^2^(Fo^2^)+(0.0113P)^2^+2.4634P] where P=(Fo^2^+2Fc^2^)/3'
_atom_sites_solution_primary    direct
_atom_sites_solution_secondary  difmap
_atom_sites_solution_hydrogens  'none'
_refine_ls_hydrogen_treatment  'none'
_refine_ls_extinction_method     SHELXL
_refine_ls_extinction_expression
Fc^^=kFc[1+0.001xFc^2^\|3^\sin(2\q)]^-1/4^
_refine_ls_extinction_coef      0.000042(12)
_refine_ls_number_reflns        220
_refine_ls_number_parameters     13
_refine_ls_number_restraints    0
_refine_ls_R_factor_all         0.0281
_refine_ls_R_factor_gt          0.0191
_refine_ls_wR_factor_ref        0.0353
_refine_ls_wR_factor_gt         0.0339
_refine_ls_goodness_of_fit_ref  1.052
_refine_ls_restrained_S_all     1.052
_refine_ls_shift/su_max         0
_refine_ls_shift/su_mean        0
_refine_diff_density_max        2.351
_refine_diff_density_min        -2.742
_refine_diff_density_rms        0.446

#-----#
#          ATOMIC TYPES, COORDINATES AND THERMAL PARAMETERS      #
#-----#

loop_
  _atom_type_symbol
  _atom_type_description
  _atom_type_scatter_dispersion_real
  _atom_type_scatter_dispersion_imag
  _atom_type_scatter_source
Ga Ga 0.2307 1.6083 'International Tables Vol C Tables 4.2.6.8 and 6.1.1.4'
Pt Pt -1.7033 8.3905 'International Tables Vol C Tables 4.2.6.8 and 6.1.1.4'
Y Y -2.7962 3.5667 'International Tables Vol C Tables 4.2.6.8 and 6.1.1.4'

loop_
  _atom_site_label
  _atom_site_type_symbol
  _atom_site_fract_x
  _atom_site_fract_y
  _atom_site_fract_z
  _atom_site_U_iso_or_equiv
  _atom_site_adp_type
  _atom_site_occupancy
  _atom_site_symmetry_multiplicity
  _atom_site_calc_flag
  _atom_site_refinement_flags
  _atom_site_disorder_assembly
  _atom_site_disorder_group
Pt2 Pt 0 0 0 0.0074(2) Uani 1 48 d S . .
Pt1 Pt 0 0.32427(3) 0.32427(3) 0.00560(10) Uani 1 4 d S . .
Y1 Y 0.30045(14) 0 0 0.0060(2) Uani 1 8 d S . .
Ga1 Ga 0.25 0.25 0.25 0.0076(3) Uani 1 12 d S . .

loop_
  _atom_site_aniso_label
  _atom_site_aniso_U_11
  _atom_site_aniso_U_22
  _atom_site_aniso_U_33
  _atom_site_aniso_U_23
  _atom_site_aniso_U_13
  _atom_site_aniso_U_12
Pt2 0.0074(2) 0.0074(2) 0.0074(2) 0 0 0
Pt1 0.00388(17) 0.00646(12) 0.00646(12) 0.00154(10) 0 0
Y1 0.0063(6) 0.0058(3) 0.0058(3) 0 0 0
Ga1 0.0076(3) 0.0076(3) 0.0076(3) 0.0029(4) 0.0029(4) 0.0029(4)

#-----#
#          MOLECULAR GEOMETRY                                     #
#-----#

```

geom\_special\_details

:

All esds (except the esd in the dihedral angle between two l.s. planes) are estimated using the full covariance matrix. The cell esds are taken into account individually in the estimation of esds in distances, angles and torsion angles; correlations between esds in cell parameters are only used when they are defined by crystal symmetry. An approximate (isotropic) treatment of cell esds is used for estimating esds involving l.s. planes.

:

loop\_

geom\_bond\_atom\_site\_label\_1  
geom\_bond\_atom\_site\_label\_2  
geom\_bond\_distance  
geom\_bond\_site\_symmetry\_2  
geom\_bond\_publ\_flag

Pt2 Y1 2.8382(13) . ?  
Pt2 Y1 2.8382(13) 57 ?  
Pt2 Y1 2.8382(13) 49 ?  
Pt2 Y1 2.8382(13) 5 ?  
Pt2 Y1 2.8382(13) 53 ?  
Pt2 Y1 2.8382(13) 9 ?  
Pt1 Ga1 2.5616(3) 26\_455 ?  
Pt1 Ga1 2.5616(3) . ?  
Pt1 Pt1 2.7350(3) 81 ?  
Pt1 Pt1 2.7350(3) 79 ?  
Pt1 Pt1 2.7350(3) 77\_455 ?  
Pt1 Pt1 2.7350(3) 35\_455 ?  
Pt1 Y1 3.0108(9) 73 ?  
Pt1 Y1 3.0108(9) 25\_455 ?  
Pt1 Y1 3.0715(4) 5 ?  
Pt1 Y1 3.0715(4) 9 ?  
Y1 Pt1 3.0108(9) 73 ?  
Y1 Pt1 3.0108(9) 75\_545 ?  
Y1 Pt1 3.0108(9) 27\_554 ?  
Y1 Pt1 3.0108(9) 25\_544 ?  
Y1 Pt1 3.0715(4) 9 ?  
Y1 Pt1 3.0715(4) 7 ?  
Y1 Pt1 3.0715(4) 11 ?  
Y1 Pt1 3.0715(4) 53 ?  
Y1 Ga1 3.3737(4) 2 ?  
Y1 Ga1 3.3737(4) . ?  
Y1 Ga1 3.3737(4) 28\_545 ?  
Ga1 Pt1 2.5616(3) 81 ?  
Ga1 Pt1 2.5616(3) 9 ?  
Ga1 Pt1 2.5616(3) 73 ?  
Ga1 Pt1 2.5616(3) 7 ?  
Ga1 Pt1 2.5616(3) 79 ?  
Ga1 Y1 3.3737(4) 81 ?  
Ga1 Y1 3.3737(4) 73 ?  
Ga1 Y1 3.3737(4) 5 ?  
Ga1 Y1 3.3737(4) 77 ?  
Ga1 Y1 3.3737(4) 9 ?

loop\_

geom\_angle\_atom\_site\_label\_1  
geom\_angle\_atom\_site\_label\_2  
geom\_angle\_atom\_site\_label\_3  
geom\_angle  
geom\_angle\_site\_symmetry\_1  
geom\_angle\_site\_symmetry\_3  
geom\_angle\_publ\_flag

Y1 Pt2 Y1 90 . 57 ?  
Y1 Pt2 Y1 180 . 49 ?  
Y1 Pt2 Y1 90 57 49 ?  
Y1 Pt2 Y1 90 . 5 ?  
Y1 Pt2 Y1 90 57 5 ?  
Y1 Pt2 Y1 90 49 5 ?  
Y1 Pt2 Y1 90 . 53 ?  
Y1 Pt2 Y1 90 57 53 ?  
Y1 Pt2 Y1 90 49 53 ?  
Y1 Pt2 Y1 180 5 53 ?  
Y1 Pt2 Y1 90 . 9 ?  
Y1 Pt2 Y1 180 57 9 ?  
Y1 Pt2 Y1 90 49 9 ?  
Y1 Pt2 Y1 90 5 9 ?  
Y1 Pt2 Y1 90 53 9 ?

Ga1 Pt1 Ga1 134.421(15) 26\_455 . ?  
Ga1 Pt1 Pt1 125.823(12) 26\_455 81 ?  
Ga1 Pt1 Pt1 57.734(3) . 81 ?  
Ga1 Pt1 Pt1 125.823(12) 26\_455 79 ?  
Ga1 Pt1 Pt1 57.734(3) . 79 ?  
Pt1 Pt1 Pt1 104.739(15) 81 79 ?  
Ga1 Pt1 Pt1 57.734(3) 26\_455 77\_455 ?  
Ga1 Pt1 Pt1 125.823(12) . 77\_455 ?  
Pt1 Pt1 Pt1 172.39(2) 81 77\_455 ?  
Pt1 Pt1 Pt1 74.738(12) 79 77\_455 ?  
Ga1 Pt1 Pt1 57.734(3) 26\_455 35\_455 ?  
Ga1 Pt1 Pt1 125.823(12) . 35\_455 ?  
Pt1 Pt1 Pt1 74.738(12) 81 35\_455 ?  
Pt1 Pt1 Pt1 172.39(2) 79 35\_455 ?  
Pt1 Pt1 Pt1 104.739(15) 77\_455 35\_455 ?  
Ga1 Pt1 Y1 151.55(2) 26\_455 73 ?  
Ga1 Pt1 Y1 74.03(2) . 73 ?  
Pt1 Pt1 Y1 64.419(15) 81 73 ?  
Pt1 Pt1 Y1 64.419(15) 79 73 ?  
Pt1 Pt1 Y1 109.162(12) 77\_455 73 ?  
Pt1 Pt1 Y1 109.162(12) 35\_455 73 ?  
Ga1 Pt1 Y1 74.03(2) 26\_455 25\_455 ?  
Ga1 Pt1 Y1 151.55(2) . 25\_455 ?  
Pt1 Pt1 Y1 109.162(12) 81 25\_455 ?  
Pt1 Pt1 Y1 109.162(12) 79 25\_455 ?  
Pt1 Pt1 Y1 64.419(15) 77\_455 25\_455 ?  
Pt1 Pt1 Y1 64.419(15) 35\_455 25\_455 ?  
Y1 Pt1 Y1 77.53(4) 73 25\_455 ?  
Ga1 Pt1 Y1 72.949(8) 26\_455 5 ?  
Ga1 Pt1 Y1 72.949(8) . 5 ?  
Pt1 Pt1 Y1 124.592(18) 81 5 ?  
Pt1 Pt1 Y1 62.15(2) 79 5 ?  
Pt1 Pt1 Y1 62.15(2) 77\_455 5 ?  
Pt1 Pt1 Y1 124.592(18) 35\_455 5 ?  
Y1 Pt1 Y1 126.176(4) 73 5 ?  
Y1 Pt1 Y1 126.176(4) 25\_455 5 ?  
Ga1 Pt1 Y1 72.949(9) 26\_455 9 ?  
Ga1 Pt1 Y1 72.949(8) . 9 ?  
Pt1 Pt1 Y1 62.15(2) 81 9 ?  
Pt1 Pt1 Y1 124.592(18) 79 9 ?  
Pt1 Pt1 Y1 124.592(18) 77\_455 9 ?  
Pt1 Pt1 Y1 62.15(2) 35\_455 9 ?  
Y1 Pt1 Y1 126.176(4) 73 9 ?  
Y1 Pt1 Y1 126.176(4) 25\_455 9 ?  
Y1 Pt1 Y1 81.60(5) 5 9 ?  
Pt2 Y1 Pt1 128.763(19) . 73 ?  
Pt2 Y1 Pt1 128.763(19) . 75\_545 ?  
Pt1 Y1 Pt1 66.92(2) 73 75\_545 ?  
Pt2 Y1 Pt1 128.763(19) . 27\_554 ?  
Pt1 Y1 Pt1 66.92(2) 73 27\_554 ?  
Pt1 Y1 Pt1 102.47(4) 75\_545 27\_554 ?  
Pt2 Y1 Pt1 128.763(19) . 25\_544 ?  
Pt1 Y1 Pt1 102.47(4) 73 25\_544 ?  
Pt1 Y1 Pt1 66.92(2) 75\_545 25\_544 ?  
Pt1 Y1 Pt1 66.92(2) 27\_554 25\_544 ?  
Pt2 Y1 Pt1 94.20(2) . 9 ?  
Pt1 Y1 Pt1 53.434(8) 73 9 ?  
Pt1 Y1 Pt1 120.27(3) 75\_545 9 ?  
Pt1 Y1 Pt1 53.434(8) 27\_554 9 ?  
Pt1 Y1 Pt1 120.27(3) 25\_544 9 ?  
Pt2 Y1 Pt1 94.20(2) . 7 ?  
Pt1 Y1 Pt1 53.434(8) 73 7 ?  
Pt1 Y1 Pt1 53.434(8) 75\_545 7 ?  
Pt1 Y1 Pt1 120.27(3) 27\_554 7 ?  
Pt1 Y1 Pt1 120.27(3) 25\_544 7 ?  
Pt1 Y1 Pt1 89.692(3) 9 7 ?  
Pt2 Y1 Pt1 94.20(2) . 11 ?  
Pt1 Y1 Pt1 120.27(3) 73 11 ?  
Pt1 Y1 Pt1 53.434(8) 75\_545 11 ?  
Pt1 Y1 Pt1 120.27(3) 27\_554 11 ?  
Pt1 Y1 Pt1 53.434(8) 25\_544 11 ?  
Pt1 Y1 Pt1 171.60(5) 9 11 ?  
Pt1 Y1 Pt1 89.692(3) 7 11 ?  
Pt2 Y1 Pt1 94.20(2) . 53 ?  
Pt1 Y1 Pt1 120.27(3) 73 53 ?  
Pt1 Y1 Pt1 120.27(3) 75\_545 53 ?  
Pt1 Y1 Pt1 53.434(8) 27\_554 53 ?



Pt1 Y1 Pt1 53.434(8) 25\_544 53 ?  
Pt1 Y1 Pt1 89.692(3) 9 53 ?  
Pt1 Y1 Pt1 171.60(5) 7 53 ?  
Pt1 Y1 Pt1 89.692(3) 11 53 ?  
Pt2 Y1 Ga1 81.88(2) . 2 ?  
Pt1 Y1 Ga1 149.36(4) 73 2 ?  
Pt1 Y1 Ga1 95.074(11) 75\_545 2 ?  
Pt1 Y1 Ga1 95.074(11) 27\_554 2 ?  
Pt1 Y1 Ga1 46.884(5) 25\_544 2 ?  
Pt1 Y1 Ga1 135.112(4) 9 2 ?  
Pt1 Y1 Ga1 135.112(4) 7 2 ?  
Pt1 Y1 Ga1 46.545(2) 11 2 ?  
Pt1 Y1 Ga1 46.545(2) 53 2 ?  
Pt2 Y1 Ga1 81.88(2) . . ?  
Pt1 Y1 Ga1 46.884(5) 73 . ?  
Pt1 Y1 Ga1 95.074(11) 75\_545 . ?  
Pt1 Y1 Ga1 95.074(11) 27\_554 . ?  
Pt1 Y1 Ga1 149.36(4) 25\_544 . ?  
Pt1 Y1 Ga1 46.545(2) 9 . ?  
Pt1 Y1 Ga1 46.545(2) 7 . ?  
Pt1 Y1 Ga1 135.112(4) 11 . ?  
Pt1 Y1 Ga1 135.112(4) 53 . ?  
Ga1 Y1 Ga1 163.76(4) 2 . ?  
Pt2 Y1 Ga1 81.88(2) . 28\_545 ?  
Pt1 Y1 Ga1 95.074(11) 73 28\_545 ?  
Pt1 Y1 Ga1 46.884(5) 75\_545 28\_545 ?  
Pt1 Y1 Ga1 149.36(4) 27\_554 28\_545 ?  
Pt1 Y1 Ga1 95.074(11) 25\_544 28\_545 ?  
Pt1 Y1 Ga1 135.112(4) 9 28\_545 ?  
Pt1 Y1 Ga1 46.545(2) 7 28\_545 ?  
Pt1 Y1 Ga1 46.545(2) 11 28\_545 ?  
Pt1 Y1 Ga1 135.112(4) 53 28\_545 ?  
Ga1 Y1 Ga1 88.857(6) 2 28\_545 ?  
Ga1 Y1 Ga1 88.857(6) . 28\_545 ?  
Pt1 Ga1 Pt1 64.532(5) . 81 ?  
Pt1 Ga1 Pt1 115.468(5) . 9 ?  
Pt1 Ga1 Pt1 180 81 9 ?  
Pt1 Ga1 Pt1 180 . 73 ?  
Pt1 Ga1 Pt1 115.468(5) 81 73 ?  
Pt1 Ga1 Pt1 64.532(5) 9 73 ?  
Pt1 Ga1 Pt1 115.468(5) . 7 ?  
Pt1 Ga1 Pt1 64.532(5) 81 7 ?  
Pt1 Ga1 Pt1 115.468(5) 9 7 ?  
Pt1 Ga1 Pt1 64.532(5) 73 7 ?  
Pt1 Ga1 Pt1 64.532(5) . 79 ?  
Pt1 Ga1 Pt1 115.468(5) 81 79 ?  
Pt1 Ga1 Pt1 64.532(5) 9 79 ?  
Pt1 Ga1 Pt1 115.468(5) 73 79 ?  
Pt1 Ga1 Pt1 180 7 79 ?  
Pt1 Ga1 Y1 120.91(2) . . ?  
Pt1 Ga1 Y1 119.494(7) 81 . ?  
Pt1 Ga1 Y1 60.506(7) 9 . ?  
Pt1 Ga1 Y1 59.09(2) 73 . ?  
Pt1 Ga1 Y1 60.506(7) 7 . ?  
Pt1 Ga1 Y1 119.494(7) 79 . ?  
Pt1 Ga1 Y1 119.494(7) . 81 ?  
Pt1 Ga1 Y1 120.91(2) 81 81 ?  
Pt1 Ga1 Y1 59.09(2) 9 81 ?  
Pt1 Ga1 Y1 60.506(7) 73 81 ?  
Pt1 Ga1 Y1 119.494(7) 7 81 ?  
Pt1 Ga1 Y1 60.506(7) 79 81 ?  
Y1 Ga1 Y1 106.99(3) . 81 ?  
Pt1 Ga1 Y1 59.09(2) . 73 ?  
Pt1 Ga1 Y1 60.506(7) 81 73 ?  
Pt1 Ga1 Y1 119.494(7) 9 73 ?  
Pt1 Ga1 Y1 120.91(2) 73 73 ?  
Pt1 Ga1 Y1 119.494(7) 7 73 ?  
Pt1 Ga1 Y1 60.506(7) 79 73 ?  
Y1 Ga1 Y1 180.00(4) . 73 ?  
Y1 Ga1 Y1 73.01(3) 81 73 ?  
Pt1 Ga1 Y1 60.506(7) . 5 ?  
Pt1 Ga1 Y1 119.494(7) 81 5 ?  
Pt1 Ga1 Y1 60.506(7) 9 5 ?  
Pt1 Ga1 Y1 119.494(7) 73 5 ?  
Pt1 Ga1 Y1 120.91(2) 7 5 ?  
Pt1 Ga1 Y1 59.09(2) 79 5 ?  
Y1 Ga1 Y1 73.01(3) . 5 ?

Y1 Ga1 Y1 106.99(3) 81 5 ?  
Y1 Ga1 Y1 106.99(3) 73 5 ?  
Pt1 Ga1 Y1 119.494(7) . 77 ?  
Pt1 Ga1 Y1 60.506(7) 81 77 ?  
Pt1 Ga1 Y1 119.494(7) 9 77 ?  
Pt1 Ga1 Y1 60.506(7) 73 77 ?  
Pt1 Ga1 Y1 59.09(2) 7 77 ?  
Pt1 Ga1 Y1 120.91(2) 79 77 ?  
Y1 Ga1 Y1 106.99(3) . 77 ?  
Y1 Ga1 Y1 73.01(3) 81 77 ?  
Y1 Ga1 Y1 73.01(3) 73 77 ?  
Y1 Ga1 Y1 180 5 77 ?  
Pt1 Ga1 Y1 60.506(7) . 9 ?  
Pt1 Ga1 Y1 59.09(2) 81 9 ?  
Pt1 Ga1 Y1 120.91(2) 9 9 ?  
Pt1 Ga1 Y1 119.494(7) 73 9 ?  
Pt1 Ga1 Y1 60.506(7) 7 9 ?  
Pt1 Ga1 Y1 119.494(7) 79 9 ?  
Y1 Ga1 Y1 73.01(3) . 9 ?  
Y1 Ga1 Y1 180 81 9 ?  
Y1 Ga1 Y1 106.99(3) 73 9 ?  
Y1 Ga1 Y1 73.01(3) 5 9 ?  
Y1 Ga1 Y1 106.99(3) 77 9 ?
